# Supplementary material for: Maximizing Performance and Stability of Organic Solar Cells at Low Driving Force for Charge Separation
Source: PubMed Central journal article supplement (PMC10853714; doi:10.1002/advs.202305948), 2023-12-01
Supplement: ADVS-11-2305948-s001.pdf [file ADVS-11-2305948-s001.pdf]

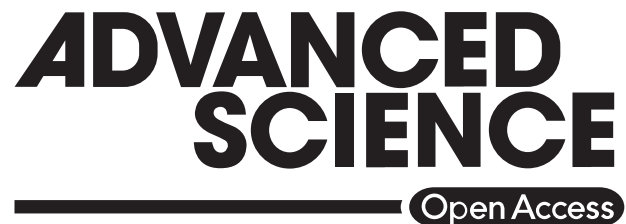

## Supporting Information

for *Adv. Sci.*, DOI 10.1002/adv.202305948

Maximizing Performance and Stability of Organic Solar Cells at Low Driving Force for Charge Separation

*Larry Lüer, Rong Wang, Chao Liu, Henry Dube, Thomas Heumüller, Jens Hauch and Christoph J. Brabec\**

# Maximizing Performance and Stability of Organic Solar Cells at Low Driving Force for Charge Separation

Larry Lüer,<sup>[a]</sup>Rong Wang,<sup>[a],[d]</sup>Chao Liu,<sup>[a]</sup> Henry Dube<sup>[b]</sup>, Thomas Heumüller, <sup>[a]</sup>Jens Hauch,  
<sup>[c]</sup>Christoph J. Brabec\*<sup>[a],[c]</sup>

[a] L. Lüer, R. Wang, C. Liu, C. J. Brabec  
Institute of Materials for Electronics and Energy Technology (i-MEET), Friedrich-Alexander-Universität Erlangen-Nürnberg, Martensstrasse 7, 91058, Erlangen, Germany

[b] H. Dube, Department Chemistry & Pharmacy, Friedrich-Alexander-Universität Erlangen-Nürnberg, Nikolaus-Fiebiger-Straße 10, 91058, Erlangen, Germany

[c] J. Hauch, C. J. Brabec  
Helmholtz-Institute Erlangen-Nürnberg (HI-ERN), Immerwahrstraße 2, 91058 Erlangen, Germany

[d] R. Wang. Erlangen Graduate School in Advanced Optical Technologies (SAOT), Paul-Gordan-Straße 6, 91052 Erlangen, Germany

Correspondence to E-mail: christoph.brabec@fau.de

## SUPPORTING INFORMATION

## MOLECULAR STRUCTURES

**Y6**: 2,2'-((2Z,2'Z)-((12,13-bis(2-ethylhexyl)-3,9-diundecyl-12,13-dihydro-[1,2,5]thiadiazolo[3,4-e]thieno[2,"3":4',5']thieno[2',3':4,5]pyrrolo[3,2-g]thieno[2',3':4,5]thieno[3,2-b]indole-2,10-diyl)bis(methanylylidene))bis(5,6-difluoro-3-oxo-2,3-dihydro-1H-indene-2,1-diylidene))dimalononitrile)

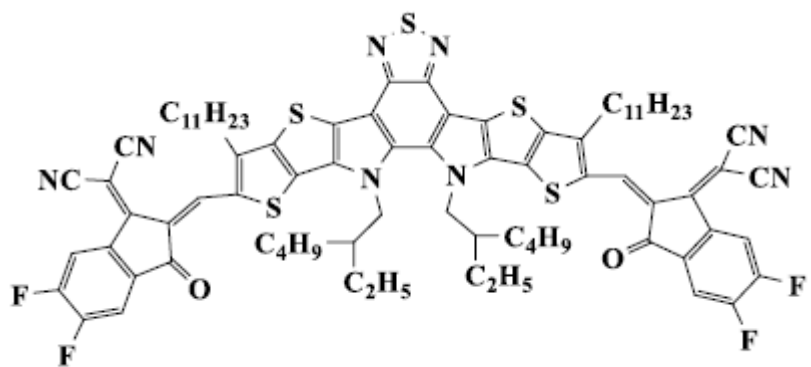

**PM6:** Poly[(2,6-(4,8-bis(5-(2-ethylhexyl-3-fluoro)thiophen-2-yl)-benzo[1,2-b:4,5-b'] dithiophene))-alt-(5,5-(1',3'-di-2-thienyl-5',7'-bis(2-ethylhexyl)benzo[1',2'-c:4',5'-c']dithiophene-4,8-dione)]
